1 **A behavioral syndrome linking boldness and flexibility facilitates invasion success in**  
2 **sticklebacks**

3  
4 Miles K. Bensky<sup>1,3</sup> and Alison M. Bell<sup>1,2,4</sup>

5 <sup>1</sup> Program in Ecology, Evolution, and Conservation Biology, School of Integrative Biology,  
6 University of Illinois, 505 S. Goodwin Ave., Urbana, IL 61801

7 <sup>2</sup> Department of Evolution, Ecology and Behavior, Carl R. Woese Institute for Genomic Biology,  
8 Neuroscience Program, University of Illinois, Urbana, Illinois 61801

9 <sup>3</sup> ORCID: 0000-0001-9776-2981

10 <sup>4</sup> ORCID: 0000-0001-8933-8494

11

12 Corresponding author:

13 Miles Bensky, Program in Ecology, Evolution, and Conservation Biology, School of Integrative  
14 Biology, University of Illinois, 505 S. Goodwin Ave., Urbana, IL 61801, e-mail:

15 [bensky2@illinois.edu](mailto:bensky2@illinois.edu), telephone: (206) 419 - 2361

16

17 Classification: Biological Sciences, Ecology, Evolution

18

19 keywords: plasticity, persistence, novel object, intraspecific variation, marine, freshwater,

20 convergent, rapid adaptation

21

22

23

24 **ABSTRACT**

25           Understanding the factors that allow a species to expand its range and adapt to changing  
26 habitats is essential for mitigating anthropogenic change. We evaluated how behavior and  
27 cognition facilitate colonization of new environments and evolve post establishment during  
28 natural biological invasions. Marine threespined sticklebacks are expert colonists with a  
29 penchant for invading freshwater environments and rapidly adapting to them. However, the role  
30 of behavior in facilitating rapid adaptation in this system has received little attention. By rearing  
31 replicate populations of sticklebacks under common garden conditions in the lab, we tested the  
32 hypothesis that boldness is favored in dispersers and that neophilia and flexibility are favored in  
33 recently-arrived immigrants. We found that dispersing populations comprised bold individuals,  
34 while sticklebacks from the invaded region were flexible in their behavior. Moreover, boldness  
35 and flexibility were negatively correlated with each another at the individual, family and  
36 population levels. Multiple lines of evidence suggest that there is a heritable component to  
37 boldness and flexibility, therefore their divergence is likely to be evolutionary in origin. If  
38 boldness is favored in invaders during the initial dispersal stage, while flexibility is favored in  
39 recent immigrants during the establishment stage, then the link between boldness and flexibility  
40 could generate positive correlations between successes during both the dispersal and  
41 establishment stages, and therefore play a key role in facilitating colonization success in this  
42 important model organism.

43

44 **SIGNIFICANCE STATEMENT**

45 For a species to expand its range, it needs to be good at dispersing and also capable of exploiting  
46 resources and adapting to different environments. Therefore, behavioral and cognitive traits such

47 as boldness, neophilia and behavioral flexibility could play key roles in facilitating invasion  
48 success. Here, we show that dispersing sticklebacks are bold, while sticklebacks that have  
49 recently established in a new region are flexible. Moreover, boldness and flexibility are  
50 negatively correlated with one another. If boldness is favored in dispersers while flexibility is  
51 favored in immigrants, then this behavioral syndrome could play a heretofore underappreciated  
52 role in facilitating rapid adaptation in this important model organism.

53

54

## 55 INTRODUCTION

56           Understanding the factors that allow a species to expand its range and adapt to changing  
57 habitats is increasingly important in the face of anthropogenic change. Natural biological  
58 invasions can reveal how and why certain organisms can excel in response to novel selection  
59 pressures (1). In addition to the importance of propagule pressure (2), stochasticity, and the  
60 opening of new niches at the edge of species boundaries, there is growing evidence that  
61 particular traits (e.g., r-selected life histories (3), habitat breadth (4), large brains/cognitive  
62 abilities (5)) might promote biological invasions.

63           Behavioral and cognitive traits are likely to play an important role in allowing animals to  
64 move into and become established in new environments (6-9). For example, behavioral plasticity  
65 allows animals to rapidly adjust their phenotype in response to changes in environmental cues  
66 (10-12). Cognitive processes – how animals perceive, process and retain information about their  
67 environment and then use that information to make decisions (13) – may play an especially  
68 important role during biological invasions because they influence the ability of animals to enter  
69 new habitats, exploit new niches, become established and spread (9, 14, 15). For example, recent  
70 immigrants have to be willing to approach and interact with novel stimuli in order to gain  
71 information about their new environment (i.e., neophilia (16)). Additionally, previously  
72 successful behavioral patterns may no longer be successful in new environments, so immigrants  
73 need to be able to stop persisting on ineffective responses and flexible enough to attempt new  
74 approaches (14).

75           Successfully colonizing a new environment can be broken down into discrete stages, e.g.,  
76 dispersal, colonization, establishment and spread (6), and invasion success likely relies on  
77 different behavioral and cognitive traits in each stage (12). For example, dispersers need to be

78 bold, while immigrants can succeed in a new environment when they are willing to investigate  
79 novel stimuli and when they are able to quickly inhibit old and ineffective behaviors, i.e., if they  
80 are flexible (12). If boldness, neophilia and behavioral flexibility are no longer beneficial or even  
81 costly once a population becomes established in a new environment, they may be lost (9, 17).  
82 Numerous studies have documented differences in behavioral traits between invading and  
83 established populations, e.g., (18-21), and a handful of studies have shown that they have a  
84 heritable basis, e.g., (22, 23). If there is an underlying genetic basis to the behavioral and  
85 cognitive traits that facilitate range expansions or biological invasions, then we might expect  
86 those traits to evolve over the course of an invasion. According to this hypothesis, behavioral and  
87 cognitive traits important for invasion should vary in a systematic way between dispersing  
88 populations compared to newly-derived and well-established populations when they are reared in  
89 a common garden. Moreover, if invasion success requires different behavioral and cognitive  
90 traits in the different invasion stages, then mechanisms that package these traits together could be  
91 key to the success of invasive species (12). For example, traits important for the dispersal and  
92 establishment stages are coupled together in western bluebirds, and this facilitates the expansion  
93 of their range (24).

94 Threespined sticklebacks (*Gasterosteus aculeatus*) are a model system for studying trait  
95 evolution during biological invasions. Throughout their evolutionary history, marine sticklebacks  
96 have repeatedly colonized freshwater environments, rapidly adapted to them and diversified (25).  
97 Sticklebacks can also spread and have dramatic impacts on freshwater communities (26, 27).  
98 Work on this system has primarily focused on a suite of morphological and physiological traits  
99 that repeatedly evolves when marine sticklebacks invade freshwater habitats (28, 29), with  
100 evidence that haplotypes containing a set of coadapted alleles are maintained at low frequency in

101 the ocean and are repeatedly tapped during adaptation to freshwater (30). However, little is  
102 known about the behavioral and cognitive mechanisms that may facilitate the invasion of  
103 sticklebacks into new habitats and which may evolve once a population becomes established  
104 (31).

105 We took advantage of the repeated invasion of freshwater habitats by sticklebacks by  
106 comparing marine stickleback to sticklebacks from recently-derived and well-established  
107 freshwater populations in Alaska, with replicate populations of each type. For each population,  
108 we reared clutches of field-fertilized eggs in a controlled laboratory environment and scored  
109 individuals for three informative and repeatable behavioral traits: boldness, behavioral flexibility,  
110 and neophilia (32). We hypothesized that boldness is favored in dispersers, that neophilia and  
111 behavioral flexibility are favored in newly-arrived immigrants, and that these traits may be  
112 subject to relaxed selection and possibly lost once a population becomes established. The  
113 replicate populations allow us to assess the generality of the patterns and comparing the newly-  
114 established to well-established populations provides insight into whether different traits are  
115 favored during initial establishment versus population persistence (33). Rearing animals under  
116 common-garden conditions in the lab also allowed us to determine if behavioral variation within  
117 and among populations likely reflect evolved, genetically based differences.

118

## 119 **RESULTS**

### 120 *Sticklebacks from dispersing populations were bold*

121 There was significant variation among populations in boldness (latency to emerge from a  
122 refuge ( $F_{5,59} = 3.30$ ,  $p = 0.01$ , Table S1, Figure 1)).

123

124

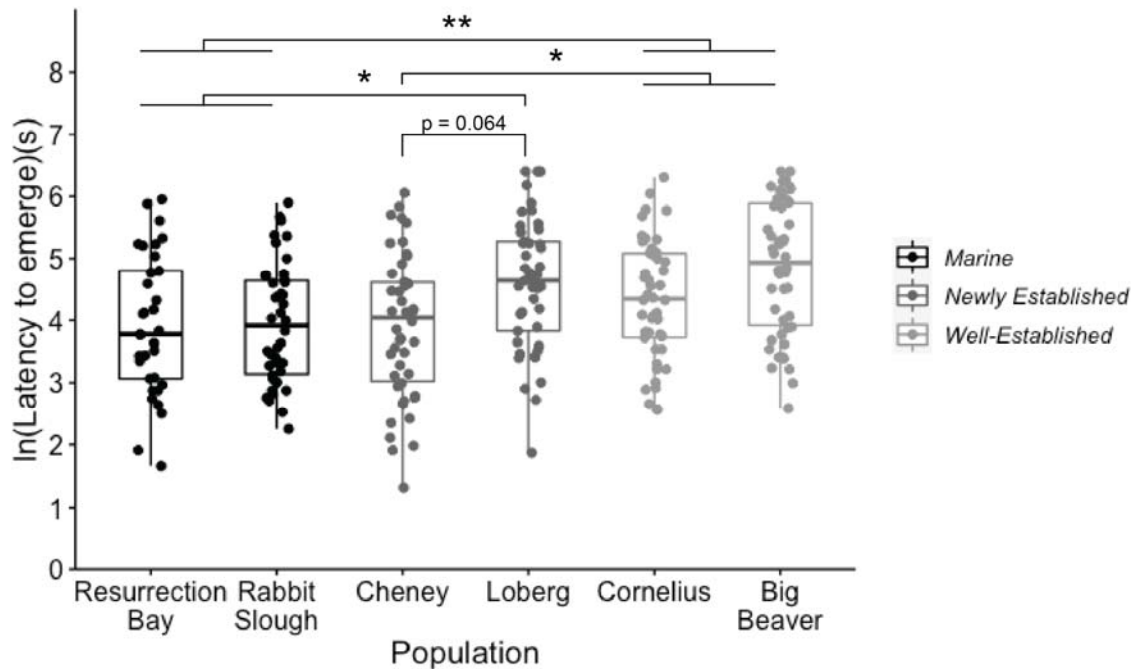

125

126 **Figure 1.** Variation among populations in boldness (latency to emerge from a refuge). Smaller  
127 values indicate greater boldness. Figure shows boxplots with individual data points  
128 superimposed.

129

130

131 Sticklebacks from dispersing populations (marine) were more bold than fish from well-  
132 established freshwater populations ( $z = 2.745$ ,  $n = 262$ ,  $p = 0.006$ ). The two recently-derived  
133 populations provide insight into the rate at which boldness diverged from the ancestral marine  
134 behavioral type. Sticklebacks from Cheney Lake, a population that was established eight years  
135 prior to collection, resembled marine populations and differed from the well-established  
136 freshwater populations (Cheney vs. well-established:  $z = -2.497$ ,  $n = 262$ ,  $p = 0.034$ ). In contrast,  
137 sticklebacks from Loberg Lake, a population that was established 28-34 years prior to collection,  
138 more closely resembled the well-established freshwater populations (Loberg Lake vs marine:  $z =$   
139  $2.429$ ,  $n = 262$ ,  $p = 0.040$ ). After correcting for multiple comparisons, there was a trend for

140 sticklebacks from Cheney Lake to emerge faster compared to sticklebacks from Loberg Lake ( $z$   
141 = -2.249,  $n = 91$ ,  $p = 0.064$ ).

142 There was significant variation in boldness among families within populations (FamilyID  
143 improved model fit ( $X^2 = 9.394$ ,  $df = 1$ ,  $p = 0.002$ ;  $AIC_{\text{with}} = 774.50$ ;  $AIC_{\text{without}} = 781.89$ )).  
144 Estimates of broad sense heritability of boldness in the six populations ranged from 0.1 to 0.75  
145 (average = 0.48) and was significantly different from zero in the Big Beaver, Cornelius and  
146 Resurrection Bay populations (Table S2).

147

#### 148 *Sticklebacks from established populations were flexible*

149 There was significant variation among populations in behavioral flexibility (time at the  
150 apex of a barrier ( $F_{5,58} = 3.495$ ,  $p = 0.008$ , Table S1, Figure 2)).

151

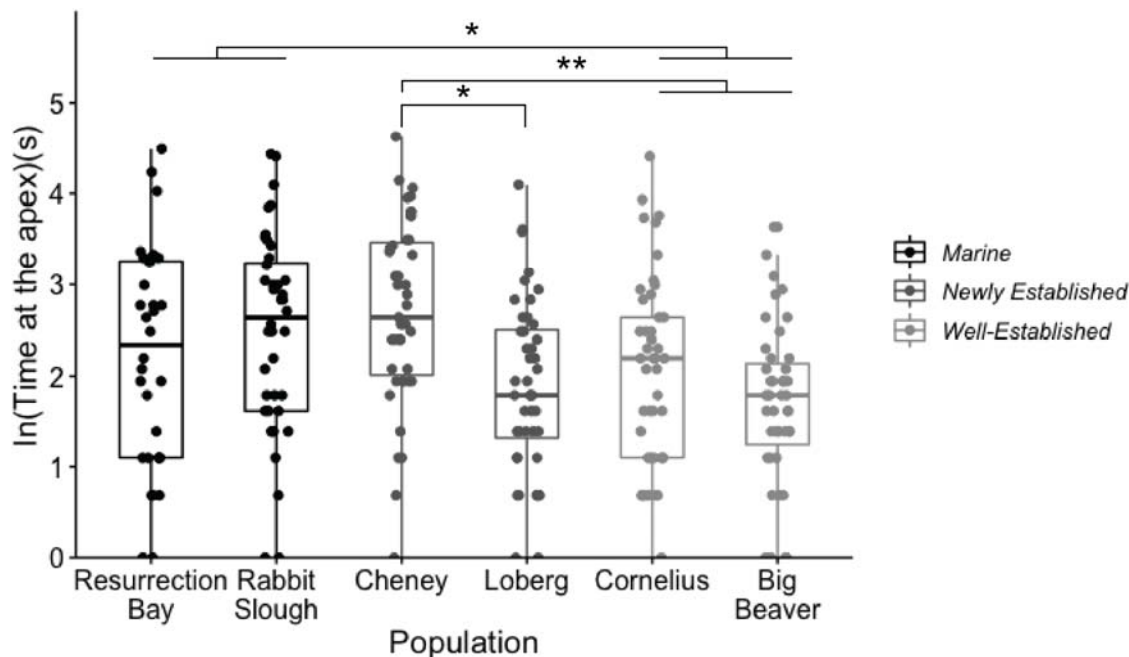

152

153 **Figure 2.** Variation among populations in flexibility (time at the apex of the barrier). Smaller  
154 values indicate greater flexibility, i.e., less time persisting on a previously-successful behavior  
155 pattern. Figure shows boxplots with individual data points superimposed.



156

157 Sticklebacks from the well-established populations were more flexible (spent less time at the  
158 apex of a barrier), compared to sticklebacks from the dispersing marine populations ( $z = -2.175$ ,  
159  $n = 158$ ,  $p = 0.030$ ). As was the case for boldness, the two recently-derived populations show  
160 different patterns: flexibility in Cheney Lake – the most recently established freshwater  
161 population – resembled flexibility in the dispersing populations, while flexibility in Loberg Lake  
162 – the freshwater population that was established 28-34 years prior to collection – resembled  
163 flexibility in the well-established freshwater populations (Cheney Lake vs Loberg Lake:  $z =$   
164  $2.821$ ,  $n = 87$ ,  $p = 0.013$ , Cheney Lake vs well-established:  $z = 3.373$ ,  $n = 131$ ,  $p = 0.002$ ).

165         There was significant variation among families within populations in flexibility ( $X^2 =$   
166  $7.350$ ,  $df = 1$ ,  $p = 0.007$ ;  $AIC_{\text{with}} = 723.74$ ;  $AIC_{\text{without}} = 729.09$ ). Estimates of broad sense  
167 heritability of flexibility in the six populations ranged from 0.22 to 0.86 (average = 0.45) and  
168 was significantly different from zero in the Cornelius population (Table S2).

169

### 170 *Neophilia did not evolve systematically during the invasion*

171         Neophilia (time near and oriented to a novel object) did not vary among populations or  
172 between the sexes (Table S1) and did not vary in a systematic manner among the different types  
173 of populations (Figure 3).

174

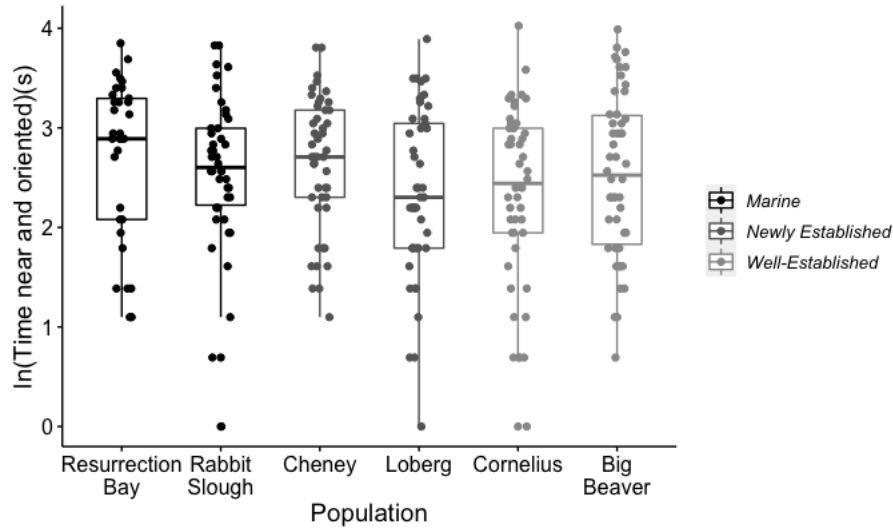

175

176 **Figure 3.** Variation among populations in neophilia (time near and oriented to the novel object).

177 Figure shows boxplots with individual data points superimposed.

178

179 Larger fish were less neophilic ( $\beta = -0.033$ ,  $t = -2.631$ ,  $df = 247.79$ ,  $p=0.009$ , Figure S2, Table

180 S1). We did not detect variation among families within populations in neophilia, as FamilyID did

181 not significantly improve model fit ( $X^2 = 2.369$ ,  $df = 1$ ,  $p = 0.124$ ;  $AIC_{\text{with}} = 636.57$ ;  $AIC_{\text{without}} =$

182 636.94). Estimates of broad sense heritability of neophilia in the six populations ranged from

183 0.09 to 0.87 (average = 0.34) and was significantly different from zero in the Cornelius

184 population (Table S2).

185

### 186 *A boldness-flexibility syndrome facilitates invasion success*

187 Given that sticklebacks from the dispersing populations were bolder and less flexible

188 compared to sticklebacks from established populations, we tested how boldness and flexibility

189 were correlated with one another. Consistent with the pattern described above, individuals that

190 were more bold (quickly emerged from the refuge) were less flexible (spent more time at the

191 barrier apex;  $r = -0.522$ ,  $n = 245$ ,  $p < 0.001$ , Table S3), and this pattern was also evident at the

192 family ( $r = -0.688$ ,  $n = 62$ ,  $p < 0.001$ ) and population ( $r = -0.91$ ,  $n = 6$ ,  $p = 0.01$ ) levels (Figure 4).

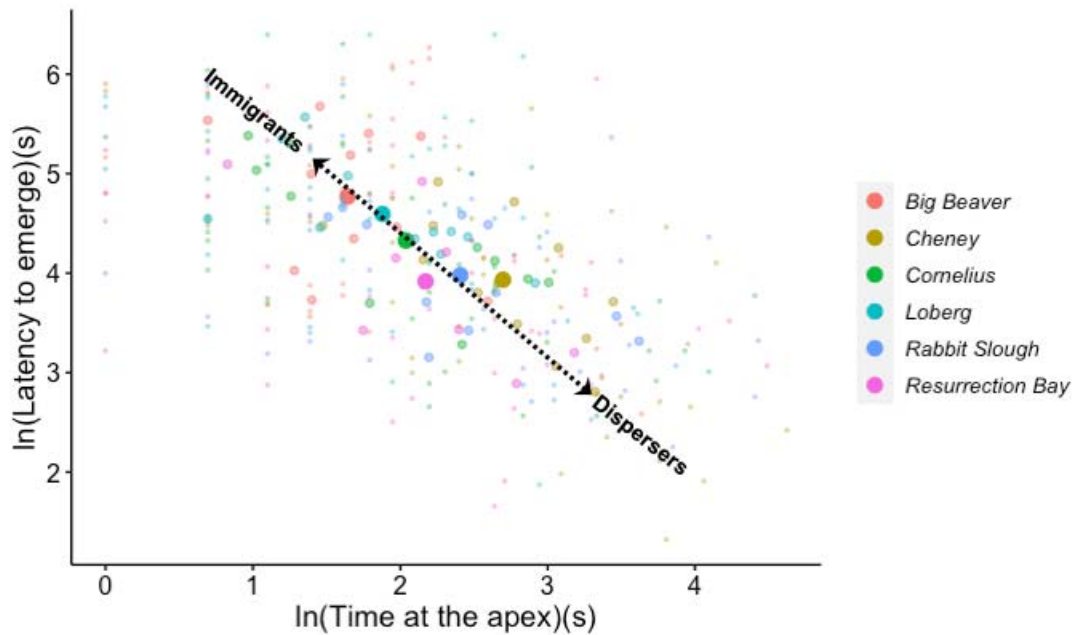

193

194 **Figure 4.** Relationship between flexibility (time at the barrier apex) and boldness (latency to  
195 emerge) within and among populations. Dispersers are relatively bold (emerge quickly) while  
196 immigrants are relatively flexible (spend less time at the barrier apex). Large circles represent  
197 populations means, medium circles show family means, small circles show individual data  
198 points. Circles are color coded by population. The line and text drawn on the figure are for visual  
199 purposes only.

200

201 The average genetic correlation between boldness and flexibility within the six populations was  $r$   
202 = -0.69 (range: -0.59 to -0.77) and was significantly different from zero in the Cornelius  
203 population (Table S3).

204

## 205 **DISCUSSION**

206 The possibility that behavioral and cognitive traits might facilitate and evolve during  
207 natural biological invasions is intriguing but difficult to study directly. Here, we took advantage

208 of a model system for invasions to test the hypothesis that boldness is favored in dispersers, that  
209 neophilia and flexibility are favored in recently-arrived immigrants and that these traits are  
210 subject to relaxed selection and possibly lost once a population becomes established in a new  
211 environment. We found that boldness and flexibility evolve in a systematic way when marine  
212 sticklebacks colonize freshwater habitats. Specifically, the dispersing populations were bold, and  
213 well-established populations were flexible. These traits varied between the two recently  
214 established populations relative to time since establishment. Moreover, boldness and flexibility  
215 were negatively correlated with one another at the individual, family and population levels.  
216 Differences in boldness and flexibility were evident in a common garden environment, there was  
217 significant variation among families in both of these traits, and estimates of their heritability and  
218 the genetic correlation between them were relatively high for behavioral traits (34). These lines  
219 of evidence suggest that there is a heritable component to the traits and that their divergence is  
220 likely to be evolutionary in origin.

221 If boldness is favored in invaders during the initial dispersal stage, while flexibility is  
222 favored in recent immigrants during the establishment stage, then a tight link between boldness  
223 and flexibility could generate positive correlations between successes during both the dispersal  
224 and establishment stage, and therefore play a key role in facilitating invasion success in this  
225 species (12). Selection favoring boldness in dispersers and flexibility in immigrants could cause  
226 the population to move along a ridge of high fitness whenever sticklebacks diverge from the  
227 ancestral marine behavioral type (Figure 4). An outstanding question is what maintains the  
228 extensive phenotypic and genetic variation in boldness and flexibility within the populations  
229 (Figures 1-4). Selection might not be strong enough to effectively purge the variation, and/or  
230 there may be ongoing gene flow between marine and freshwater habitats which maintains

231 recessive alleles associated with behavioral flexibility at low frequency in marine populations  
232 (transporter hypothesis (35)), as appears to operate at the *Eda* locus (36) and surrounding  
233 genomic regions (30).

234         We found no support for the hypothesis that traits which promote dispersal and early  
235 establishment in a new environment are lost once a population becomes well-established (9), i.e.,  
236 no evidence that newly-derived populations were more bold, neophilic and flexible than well-  
237 established populations. One possible explanation for this pattern is that *assortative mating*  
238 within dispersing populations causes dispersing behavioral phenotypes to be maintained early in  
239 the establishment process, even in the presence of selection favoring more flexible phenotypes  
240 (37). The comparison between the two newly-derived populations (Cheney Lake and Loberg  
241 Lake, respectively) is also insightful; the two newly derived populations either tended to  
242 resemble the dispersing populations or the well-established populations. Cheney Lake was  
243 founded more recently than Loberg Lake (9 versus 28-34 years prior to this study); if it takes  
244 longer than 10 generations for behavioral and cognitive traits to diverge from the ancestral  
245 marine behavioral type then *time since establishment* could be important. Alternatively, or in  
246 addition, the phenotypic differences between sticklebacks from Loberg Lake and Cheney Lake  
247 could reflect differences in the way that the two lakes were colonized; Loberg Lake was  
248 naturally colonized, while sticklebacks were experimentally introduced to Cheney Lake. If  
249 particularly flexible individuals were more likely to disperse into Loberg Lake, but a random  
250 sample of behavioral types were artificially introduced into Cheney Lake (38-40), then *non-*  
251 *random dispersal* could be contributing to the rapid evolution of increased flexibility in Loberg  
252 Lake. Given evidence from the literature (39, 40) and from this study that bold individuals are  
253 more likely to disperse, and that boldness and flexibility are tightly *negatively* correlated with

254 one another, this explanation seems unlikely. Further studies tracking how behavioral and  
255 cognitive traits change over time in the Cheney Lake population (and similar experimental lakes  
256 (e.g., Scout Lake)) could help discriminate between the assortative mating, time since  
257 establishment and non-random dispersal hypotheses.

258 We originally hypothesized that neophilia would be favored in recently-derived  
259 populations because seeking and/or being willing to investigate novel stimuli may help newly-  
260 arrived immigrants locate new habitats and discover novel resources, but we found no support  
261 for this hypothesis. One possible explanation for the failure to find systematic differences in  
262 neophilia among the populations is that neophilia may actually be disadvantageous in a new  
263 environment because it can expose animals to dangerous stimuli they have never encountered  
264 before. Another potential (nonexclusive) explanation based on our results is that neophilia may  
265 not evolve as readily because it may be less heritable (effect of FamilyID was nonsignificant,  
266 lower  $H^2$  estimate). Instead, neophilia may be more influenced by age or experience: in this  
267 study, smaller (and younger:  $r = -0.159$ ,  $t = -2.595$ ,  $n = 262$ ,  $p=0.01$ ) fish were more neophilic,  
268 which is consistent with other studies which have shown that novelty-seeking decreases with age  
269 (41).

270 Sticklebacks are a powerful model system for understanding how and why certain traits  
271 repeatedly evolve whenever organisms invade new habitats. Accumulating evidence suggests  
272 that sticklebacks have evolved mechanisms for rapidly adapting to new environments with  
273 alleles conferring the freshwater-adapted phenotype maintained at low frequency in the ocean  
274 (28). But the role of behavior and cognition in facilitating evolutionary processes in this system  
275 has received less attention (31). Our results suggest that a behavioral mechanism – a behavioral

276 syndrome linking boldness and flexibility together – contributes to rapid adaptation in this  
277 important model organism.

278

## 279 **MATERIALS AND METHODS**

280 Adult sticklebacks were collected via minnow traps from six populations ranging from  
281 the Matanuska-Susitna Valley to the Kenai Peninsula of Alaska (Figure S1; Table S1) during  
282 June 2017. Two populations (Rabbit Slough and Resurrection Bay) occur in the ancestral marine  
283 environment, while the remaining four populations occur in freshwater. Two of the freshwater  
284 populations (Big Beaver and Cornelius, hereafter referred to as “well-established”) are derived  
285 from natural colonization events that presumably occurred hundreds to thousands of years ago,  
286 after the last glacial maximum, while the other two freshwater populations are recently derived  
287 via natural recolonization (Loberg: 28-34 years prior to collection; (29)) or experimental seeding  
288 (Cheney: 8 years prior to collection; (42)). As is typical for sticklebacks, the marine populations  
289 are only weakly genetically differentiated from each other ( $F_{ST} = 0.0076$ ; (43)) while the  
290 freshwater populations are more strongly genetically differentiated (M. Bell, K Veeramah,  
291 personal communication).

292 Eggs were fertilized in the field following previously established protocols (see (44)).  
293 Two to three days post fertilization, the eggs were transferred to 50 mL canonical tubes and  
294 shipped overnight in coolers filled with ice packs to the University of Illinois Urbana-Champaign  
295 where they were raised in common garden conditions in the lab. Artificial incubation controls  
296 for environmental paternal effects due to receiving paternal care therefore it is likely that  
297 phenotypic differences among the lab-reared populations reflect heritable differences (although  
298 environmental maternal effects could also contribute).

299 Clutches were reared in separate tanks (9.5L 32 x 21 x 19 cm) where the embryos were  
300 incubated in a cup with a mesh bottom and placed over an air bubbler. Fish were kept at 60°F  
301 with an even light cycle (12L:12D) for the entirety of the experiment. All families were kept on  
302 one of two recirculating flow-through water racks, which consisted of a series of particular,  
303 biological, and IV filters and had three different shelves (Aquanearing , San Diego, USA). 10%  
304 of each tank’s water was replaced each day. Family tank position was pseudo-randomly assigned  
305 so that all populations were evenly distributed across both racks and the three levels of shelves.  
306 Importantly, we elected to rear the fish and measure their behavior in freshwater (~5ppt), thereby  
307 simulating the conditions that marine sticklebacks encounter when they move into freshwater.  
308 Because the marine populations studied here are naturally anadromous (Rabbit Slough: (42);  
309 Resurrection Bay: R. King, pers. comm.), i.e., they spawn in fresh/brackish waters, their early  
310 offspring development typically occurs under low salinity.

311

## 312 ***Behavioral assays***

313 ***Summary of the behavioral assays.*** Neophilia was measured as response to a novel  
314 object. Boldness was measured as latency to emerge from a refuge, a reliable and widely-used  
315 behavioral assay in fishes (45, 46). Boldness was quantified at the individual level as average  
316 latency to emerge across four independent trials. Behavioral flexibility was measured in a barrier  
317 task: after pretraining individuals to expect a food reward upon emergence from a refuge,  
318 individuals were confronted by a transparent barrier that they had to swim around in order to get  
319 the food reward. Individuals that continue to follow the prepotent search pattern established  
320 during training spend relatively more time at the point of the barrier closest to the food reward  
321 (“barrier apex”), which we interpret as relatively low flexibility. In contrast, individuals that



322 quickly break away from the previously-established behavior pattern spend relatively little time  
323 spent at the apex of the barrier, which we interpret as relatively high flexibility. A previous study  
324 in sticklebacks found that time at the apex of the barrier predicts reversal learning performance  
325 (32), another common metric of behavioral flexibility.

326 ***Detailed experimental methods.*** 18 observation tanks (36L x 33W x 24H cm) were used  
327 for behavioral testing. When the fish were approximately eight months of age (approximately 40  
328 mm standard length), the testing phase of the experiment began. Behavioral assays were carried  
329 out over the course of 5 months. Families, sexes and populations were measured in a  
330 pseudorandomized order, such that male and female offspring from different families and from  
331 different populations were measured in the same block. Individuals were randomly selected from  
332 each family, and their weight and length were measured. During the testing phase of the  
333 experiment, fish were only fed during the behavioral tests to help maintain motivation.

334

### 335 ***Acclimation phase***

336 In order to ensure that an individual had acclimated to their home tank and was motivated  
337 to eat during the behavioral tests, the individual was presented with food via a petri dish at the  
338 center of their home tank, and the individual had to eat the food within 10 minutes on three  
339 consecutive days in order to proceed to the next step. On average, it took 5.1 days for fish to  
340 meet this criterion (range = 3 to 17 days).

341

### 342 ***Novel object test (neophilia)***

343 Individuals' response to a novel object (toy lion; 10L x 7H cm; TERRA by Battat,  
344 Montreal, Canada) was recorded the day after the fish met criterion in the acclimation phase. The

345 toy lion was selected as a novel object because the fish had no prior experience with this object,  
346 there was no presumed evolutionary history with the object's shape, and it was made up of  
347 neutral colors.

348 The individual's behavior was measured for five minutes after their first approach to the  
349 novel object (i.e., first time within one body length of the novel object and oriented directly  
350 towards it). We interpret more time spent near and oriented towards the novel object as greater  
351 time investigating the object (i.e., higher neophilia).

352

### 353 *Latency to emerge (boldness)*

354 For each individual, we recorded their latency to emerge from a refuge on their first four  
355 training trials for the barrier task (described below) and used the average of those measures as a  
356 proxy for boldness (Movie S1). Latency to emerge was repeatable across the four trials within  
357 each population ( $r=0.56-0.72$ , Table S4).

358

### 359 *Barrier detour task (flexibility)*

360 Pretraining for the barrier detour task started on the same day the novel object test was  
361 completed. The goals of pretraining were to train the individual to learn that there would  
362 consistently be a food reward in the middle of the tank, establish food motivation in this context,  
363 and create a prepotent response of leaving a shelter to directly approach and eat the food reward.

364 During pretraining, individuals were trained for one session per day, with each session  
365 comprising four trials. To start the trial, the observer removed a cork from the side of the shelter  
366 and the fish was given ten minutes to exit. Upon exiting the fish was allowed five minutes to eat  
367 the worm.

368           After eating the worm, the fish was placed back into the shelter in preparation for the  
369 next trial. If the fish did not emerge from the shelter within ten minutes after the cork was pulled  
370 or eat within five minutes after emergence, the observer recorded the maximum times for these  
371 behaviors, removed the food reward and gently poured the fish out of the shelter if necessary.  
372 Latency to emerge from a refuge during the first pretraining session was used as a measure of  
373 boldness (see above).

374           Training for the barrier task was criterion based. In order to move on to the barrier task  
375 following pretraining, the individual had to emerge from the shelter within 10 minutes and  
376 directly approach and eat the food reward within five seconds on three out of the four trials. The  
377 one failed attempt could not be on the fourth trial; this requirement ensured that the fish would  
378 be motivated throughout the four trials. Fish were given a maximum of four days to reach  
379 criterion. Fifteen fish did not meet criterion (Big Beaver: 7, Cornelius: 1, Loberg: 1, Cheney: 3,  
380 Rabbit Slough: 2, Resurrection Bay: 1).

381           Once an individual met criterion, the individual moved on to the barrier detour task the  
382 following day. This task also comprised four trials. The first two trials were exactly the same as  
383 the pretraining trials in order to reinforce the direct search pattern. On the third trial a transparent  
384 semi-circular barrier was placed between the shelter and food reward. The opening into the  
385 barrier area was positioned directly in front of the entrance to the shelter. After removing the  
386 cork the individual was allowed 30 minutes to emerge from the shelter, navigate around the  
387 barrier and eat the food reward (Movie S2). The observer recorded the duration of the first bout  
388 (no break in contact longer than five seconds) at the apex of the barrier. In order to confirm that  
389 the fish that spent little time at the barrier apex during the third trial were still motivated to eat,  
390 the fish's behavior was observed for a fourth trial during which no barrier was present.

391 Altogether, a total of n=262 individuals from n=8-11 families per population (n=2-7 full  
392 sibs per family) completed the novel object test and boldness assay. A total of n=247 individuals  
393 from n=8-11 families per population (n=1-4 full sibs per family) completed the barrier task. The  
394 experiments were approved by the Institutional Animal Care and Use Committee (IACUC) of  
395 the University of Illinois Urbana-Champaign (IACUC protocol #15077).

396

### 397 *Statistical analysis*

398 R 3.5.3 (<http://www.r-project.org/>) was used for statistical analyses. Positively-skewed  
399 variables were log-transformed to improve normality, model residuals were also visually  
400 inspected for deviations from normality.

401 We used linear mixed models (47)(package = “lme4”; function = “lmer”) to examine the  
402 behavioral data in each assay separately. We created models in which population and sex were  
403 included as fixed factors, and body length was included as a covariate. FamilyID nested within  
404 population was included as a random variable. The statistical significance of the effect of  
405 FamilyID was assessed by AIC (48), i.e., by comparing models with and without the effect of  
406 FamilyID (R Core Team 2016; package = “care”; function = “anova”). We infer that a trait has  
407 an underlying heritable basis when the trait differs among populations (because they were reared  
408 in a common garden), and/or when FamilyID improves model fit. To further explore the  
409 heritable basis to these traits we also computed broad-sense heritabilities and genetic correlations  
410 within each population following (49, 50). We used weakly informative inverse-gamma priors  
411 for the ‘residual’ and ‘genetic’ effects (by setting the MCMCglmm parameters  $V_{\square} = \square 1$ ,  
412  $\nu_{\square} = \square 0.002$ ). In order to test for genetic correlations, a 2x2 covariance matrix was specified  
413 with the degree of belief parameter set to n=1.002. The raw positively-skewed duration data for

414 all the behavioral measures were used for this analysis, and thus all measures were rounded to  
415 the nearest integer and a Poisson distribution was used. The posterior distribution was sampled  
416 every 3000 times (thinning interval), following a burn-in period of 100,000 iterations with a  
417 total run of 10,000,000 iterations. The relatively modest number of families and full sibs  
418 within each family resulted in large confidence intervals around the estimates therefore we  
419 interpret those results with some caution.

420 To examine the structure of the phenotypic variation both among and within populations,  
421 we examined correlations between traits at the individual, family and population level.

422 See SI Methods for more details.

423

## 424 **ACKNOWLEDGEMENTS**

425 We thank Matt Wund, Mike Bell, John Baker, and the members of the Foster Lab for  
426 help with field work. The Bell lab, Andy Suarez, Jason Keagy, Becky Fuller and Katy Heath  
427 provided valuable feedback.

428

## 429 **REFERENCES**

- 430 1. K. D. Whitney, C. A. Gabler, Rapid evolution in introduced species, ‘invasive traits’ and  
431 recipient communities: challenges for predicting invasive potential. *Diversity and*  
432 *Distributions* **14**, 569-580 (2008).
- 433 2. J. L. Lockwood, P. Cassey, T. Blackburn, The role of propagule pressure in explaining  
434 species invasions. *Trends in Ecology & Evolution* **20**, 223-228 (2005).
- 435 3. I. Capellini, J. Baker, W. L. Allen, S. E. Street, C. Venditti, The role of life history traits  
436 in mammalian invasion success. *Ecology Letters* **18**, 1099-1107 (2015).
- 437 4. T. M. Blackburn, P. Cassey, J. L. Lockwood, The role of species traits in the  
438 establishment success of exotic birds. *Global Change Biology* **15**, 2852-2860 (2009).
- 439 5. D. Sol, R. P. Duncan, T. M. Blackburn, P. Cassey, L. Lefebvre, Big brains, enhanced  
440 cognition, and response of birds to novel environments. *Proceedings of the National*  
441 *Academy of Sciences of the United States of America* **102**, 5460-5465 (2005).

- 442 6. D. G. Chapple, S. M. Simmonds, B. B. M. Wong, Can behavioral and personality traits  
443 influence the success of unintentional species introductions? *Trends in Ecology &*  
444 *Evolution* **27**, 57-64 (2012).
- 445 7. K. S. Hoset *et al.*, Natal dispersal correlates with behavioral traits that are not consistent  
446 across early life stages. *Behavioral Ecology* **22**, 176-183 (2011).
- 447 8. A. Sih *et al.*, Predator-prey naïveté, antipredator behavior, and the ecology of predator  
448 invasions. *Oikos* **119**, 610-621 (2010).
- 449 9. T. F. Wright, J. R. Eberhard, E. A. Hobson, M. L. Avery, M. A. Russello, Behavioral  
450 flexibility and species invasions: the adaptive flexibility hypothesis. *Ethology Ecology &*  
451 *Evolution* **22**, 393-404 (2010).
- 452 10. C. M. Coppens, S. F. d. Boer, J. M. Koolhaas, Coping styles and behavioural flexibility:  
453 towards underlying mechanisms. *Philosophical Transactions of the Royal Society B:*  
454 *Biological Sciences* **365**, 4021-4028 (2010).
- 455 11. M. Wolf, G. S. van Doorn, F. J. Weissing, Evolutionary emergence of responsive and  
456 unresponsive personalities. *Proc Natl Acad Sci U S A* **105**, 15825-15830 (2008).
- 457 12. A. Sih, J. Cote, M. Evans, S. Fogarty, J. Pruitt, Ecological implications of behavioural  
458 syndromes. *Ecology Letters* **15**, 278-289 (2012).
- 459 13. S. J. Shettleworth, *Cognition, Evolution, and Behavior* (Oxford University Press, 2010).
- 460 14. A. S. Griffin, D. Guez, I. Federspiel, M. Diquelou, F. Lermite, "Invading new  
461 environments: A mechanistic framework linking motor diversity and cognition to  
462 establishment success" in *Biological Invasions and Animal Behaviour*, D. Sol, J. S. Weis,  
463 Eds. (Cambridge University Press, Cambridge, 2016), DOI:  
464 10.1017/CBO9781139939492.004, pp. 26-46.
- 465 15. B. Szabo, I. Damas-Moreira, M. J. Whiting, Can cognitive ability give invasive species  
466 the means to succeed? A review of the evidence. *Frontiers in Ecology and Evolution* **8**  
467 (2020).
- 468 16. C. Mettke-Hofmann, S. Lorentzen, E. Schlicht, J. Schneider, F. Werner, Spatial neophilia  
469 and spatial neophobia in resident and migratory warblers (*Sylvia*). *Ethology* **115**, 482-492  
470 (2009).
- 471 17. G. Herczeg *et al.*, Is foraging innovation lost following colonization of a less variable  
472 environment? A case study in surface- vs. cave-dwelling *Asellus aquaticus*. *Ecology and*  
473 *Evolution* **10**, 5323-5331 (2020).
- 474 18. L. M. Pintor, A. Sih, M. L. Bauer, Differences in aggression, activity and boldness  
475 between native and introduced populations of an invasive crayfish. *Oikos* **117**, 1629-1636  
476 (2008).
- 477 19. L. B. Martin, L. Fitzgerald, A taste for novelty in invading house sparrows, *Passer*  
478 *domesticus*. *Behavioral Ecology* **16**, 702-707 (2005).
- 479 20. T. M. Cohen, R. S. Kumar, M. Nair, M. E. Hauber, R. Dor, Innovation and decreased  
480 neophobia drive invasion success in a widespread avian invader. *Animal Behaviour* **163**,  
481 61-72 (2020).
- 482 21. I. Damas-Moreira, J. L. Riley, D. J. Harris, M. J. Whiting, Can behaviour explain  
483 invasion success? A comparison between sympatric invasive and native lizards. *Animal*  
484 *Behaviour* **151**, 195-202 (2019).
- 485 22. J. Gruber, G. Brown, M. J. Whiting, R. Shine, Geographic divergence in dispersal-related  
486 behaviour in cane toads from range-front versus range-core populations in Australia.  
487 *Behavioral Ecology and Sociobiology* **71** (2017).



- 488 23. L. W. Sargent, D. M. Lodge, Evolution of invasive traits in nonindigenous species:  
489 increased survival and faster growth in invasive populations of rusty crayfish (*Orconectes*  
490 *rusticus*). *Evolutionary Applications* **7**, 949-961 (2014).
- 491 24. R. A. Duckworth, A. V. Badyaev, Coupling of dispersal and aggression facilitates the  
492 rapid range expansion of a passerine bird. *Proceedings of the National Academy of*  
493 *Sciences* **104**, 15017-15022 (2007).
- 494 25. Y. E. Stuart, M. P. Travis, M. A. Bell, Inferred genetic architecture underlying evolution  
495 in a fossil stickleback lineage. *Nat. Ecol. Evol.* 10.1038/s41559-020-01287-x, 14.
- 496 26. J. S. Eklöf *et al.*, A spatial regime shift from predator to prey dominance in a large  
497 coastal ecosystem. *Communications Biology* **3**, 459 (2020).
- 498 27. S. M. Gugele, J. Baer, A. Brinker, The spatiotemporal dynamics of invasive three-spined  
499 sticklebacks in a large, deep lake and possible options for stock reduction. *Fisheries*  
500 *Research* **232**, 105746 (2020).
- 501 28. P. F. Colosimo *et al.*, Widespread parallel evolution in sticklebacks by repeated fixation  
502 of ectodysplasin alleles. *Science* **307**, 1928 - 1933 (2005).
- 503 29. M. A. Bell, W. E. Aguirre, N. J. Buck, Twelve years of contemporary armor evolution in  
504 a threespine stickleback population. *Evolution* **58**, 814-824 (2004).
- 505 30. S. Bassham, J. Catchen, E. Lescak, F. A. von Hippel, W. A. Cresko, Repeated selection  
506 of alternatively adapted haplotypes creates sweeping genomic remodeling in stickleback.  
507 *Genetics* **209**, 921-939 (2018).
- 508 31. S. A. Foster, M. A. Wund, J. A. Baker, Evolutionary influences of plastic behavioral  
509 responses upon environmental challenges in an adaptive radiation. *Integrative and*  
510 *Comparative Biology* **55**, 406-417 (2015).
- 511 32. M. K. Bensky, A. M. Bell, Predictors of individual variation in reversal learning  
512 performance in three-spined sticklebacks. *Animal Cognition* **23**, 925-938 (2020).
- 513 33. A. C. Merwin, Flight capacity increases then declines from the core to the margins of an  
514 invasive species' range. *Biology Letters* **15** (2019).
- 515 34. N. A. Dochtermann, T. Schwab, M. Anderson Berdal, J. Dalos, R. Royauté, The  
516 heritability of behavior: A meta-analysis. *J Hered* **110**, 403-410 (2019).
- 517 35. D. Schluter, G. L. Conte, Genetics and ecological speciation. *Proceedings of the National*  
518 *Academy of Sciences* **106**, 9955-9962 (2009).
- 519 36. F. C. Jones *et al.*, The genomic basis of adaptive evolution in threespine sticklebacks.  
520 *Nature* **484**, 55-61 (2012).
- 521 37. R. Shine, G. P. Brown, B. L. Phillips, An evolutionary process that assembles phenotypes  
522 through space rather than through time. *Proceedings of the National Academy of Sciences*  
523 **108**, 5708-5711 (2011).
- 524 38. P. Edelaar, D. I. Bolnick, Non-random gene flow: an underappreciated force in evolution  
525 and ecology. *Trends in Ecology & Evolution* **27**, 659-665 (2012).
- 526 39. D. Canestrelli, R. Bisconti, C. Carere, Bolder takes all? The behavioral dimension of  
527 biogeography. *Trends in Ecology & Evolution* **31**, 35-43 (2016).
- 528 40. J. Cote, J. Clobert, T. Brodin, S. Fogarty, A. Sih, Personality-dependent dispersal:  
529 characterization, ontogeny and consequences for spatially structured populations.  
530 *Philosophical Transactions of the Royal Society B-Biological Sciences* **365**, 4065-4076  
531 (2010).
- 532 41. K. H. Stansfield, C. L. Kirstein, Effects of novelty on behavior in the adolescent and  
533 adult rat. *Developmental Psychobiology* **48**, 10-15 (2006).

- 534 42. M. A. Bell, Heins, D. C., Wund, M. A., von Hippel, F. A., Massengill, R., Dunker, K., ...  
535 & Aguirre, W. E. , Reintroduction of threespine stickleback into Cheney and Scout  
536 Lakes, Alaska. . *Evolutionary Ecology Research* **17**, 157-178 (2016).
- 537 43. P. A. Hohenlohe *et al.*, Population genomics of parallel adaptation in threespine  
538 stickleback using sequenced RAD tags. *PLOS Genetics* **6**, e1000862 (2010).
- 539 44. M. A. Wund, S. Valena, S. Wood, J. A. Baker, Ancestral plasticity and allometry in  
540 threespine stickleback fish reveal phenotypes associated with derived, freshwater  
541 ecotypes. *Biol J Linn Soc Lond* **105**, 573-583 (2012).
- 542 45. A. D. M. Wilson, J.-G. J. Godin, Boldness and behavioral syndromes in the bluegill  
543 sunfish, *Lepomis macrochirus*. *Behavioral Ecology* **20**, 231-237 (2009).
- 544 46. S. Pearish, L. Hostert, A. M. Bell, Behavioral type-environment correlations in the field:  
545 a study of three-spined stickleback. *Behav Ecol Sociobiol* **67**, 765-774 (2013).
- 546 47. R. C. Team, *R: A language and environment for statistical computing* (R Foundation for  
547 Statistical Computing, Vienna, Austria, 2013).
- 548 48. H. Akaike, "Information theory and an extension of the maximum likelihood principle" in  
549 Proceedings of the Second International Symposium on Information Theory, B. N. P. a.  
550 S. Caski, Ed. (Akademiai Kiado, Budapest, Hungary, 1973), pp. 267– 281.
- 551 49. J. D. Hadfield, MCMC methods for multi-response generalized linear mixed models: The  
552 MCMCglmm R package. *2010* **33**, 22 (2010).
- 553 50. A. J. Wilson *et al.*, An ecologist's guide to the animal model. *Journal of Animal Ecology*  
554 **79**, 13-26 (2010).
- 555

556



557 **FIGURES**

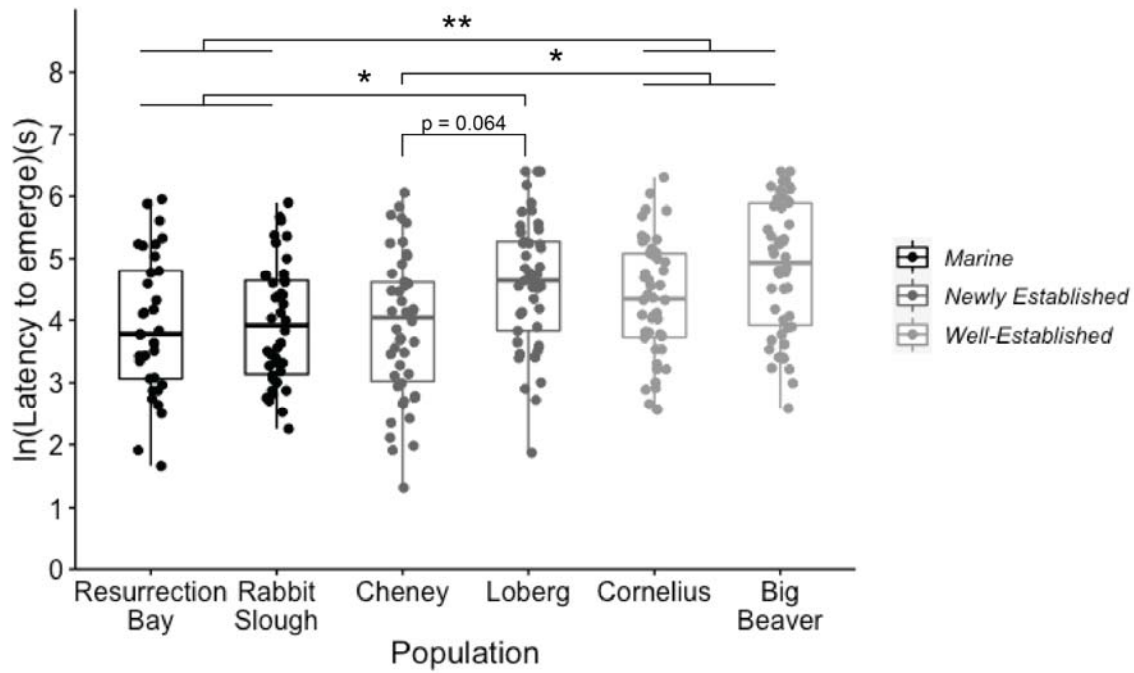

558

559 **Figure 1.** Variation among populations in boldness (latency to emerge from a refuge). Smaller  
560 values indicate greater boldness. Figure shows boxplots with individual data points  
561 superimposed.

562

563

564

565

566

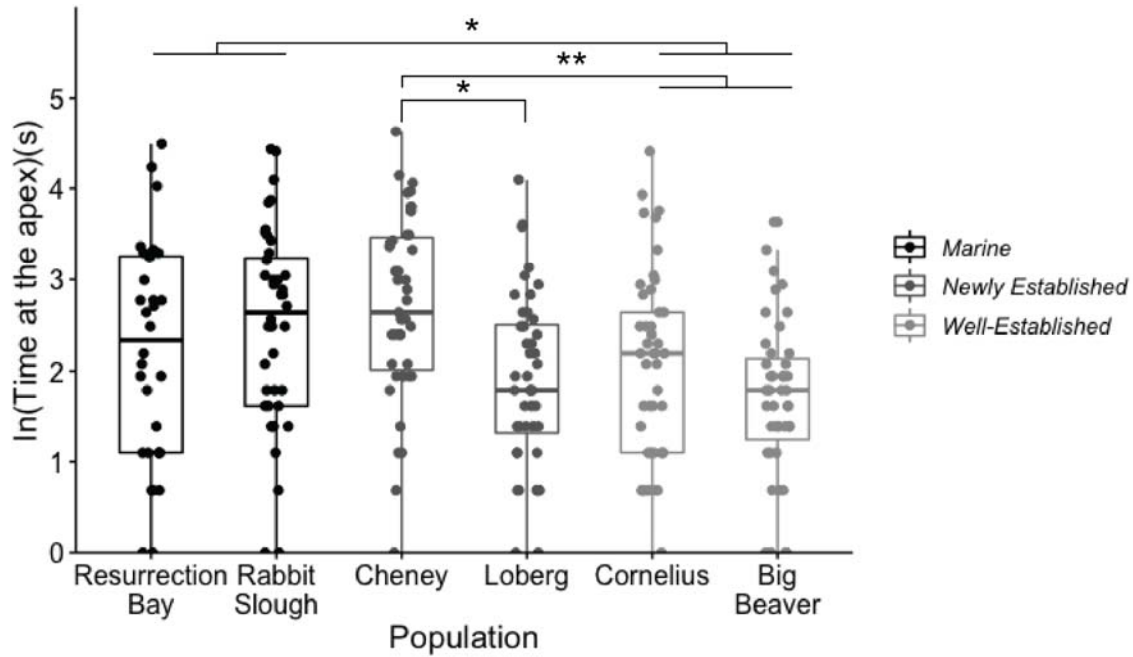

567

568 **Figure 2.** Variation among populations in flexibility (time at the apex of the barrier). Smaller  
569 values indicate greater flexibility, i.e., less time persisting on a previously-successful behavior  
570 pattern. Figure shows boxplots with individual data points superimposed.

571

572

573

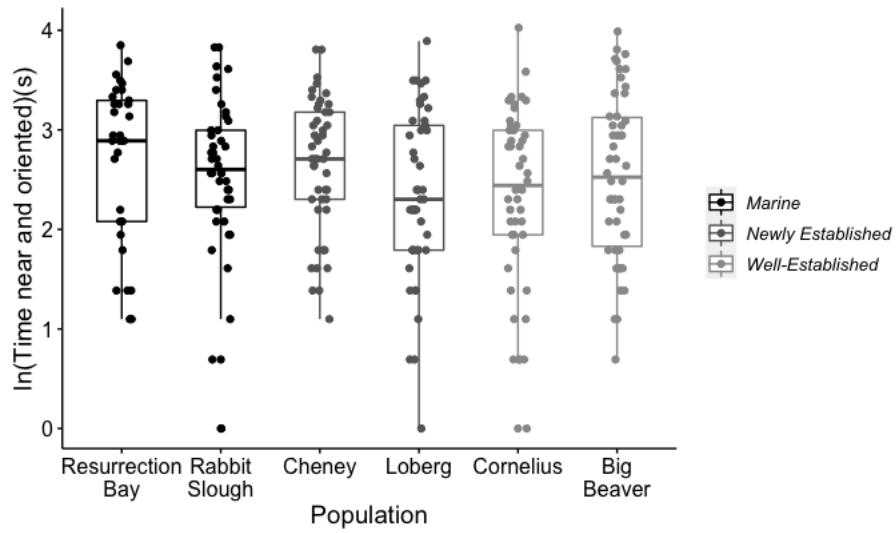

574

575 **Figure 3.** Variation among populations in neophilia (time near and oriented to the novel object).

576 Figure shows boxplots with individual data points superimposed.

577

578



579

580 **Figure 4.** Relationship between flexibility (time at the barrier apex) and boldness (latency to  
581 emerge) within and among populations. Dispersers are relatively bold (emerge quickly) while  
582 immigrants are relatively flexible (spend less time at the barrier apex). Large circles represent  
583 populations means, medium circles show family means, small circles show individual data  
584 points. Circles are color coded by population. The line and text drawn on the figure are for visual  
585 purposes only.

586

587

588

589 **Contact and competing interest information for all authors.** The authors have no competing  
590 interests.

591

592 **Data sharing plans (including all data, documentation, and code used in analysis).** The data  
593 will be made available on Dryad.

594

595 **Funding information and whether an open access license has been selected.** Financial  
596 support was provided by the National Science Foundation's Integrative Graduate Education and  
597 Research Traineeship program and by the University of Illinois. This material is based upon  
598 work supported by the National Science Foundation under Grant No. IOS 1121980 and by the  
599 National Institutes of Health under award number 2R01GM082937-06A1. Open access has not  
600 been selected.

601

602

603

# PNAS

[www.pnas.org](http://www.pnas.org)

604

605

606

607

608

609

610 **Supplementary Information for**

611 A behavioral syndrome linking boldness and flexibility facilitates invasion success in sticklebacks

612

613

614 Miles K. Bensky and Alison M. Bell

615

616 Miles K. Bensky

617 Email: [bensky2@illinois.edu](mailto:bensky2@illinois.edu)

618

619 **This PDF file includes:**

620

621       Supplementary text

622       Figures S1 to S2

623       Tables S1 to S4

624       Legends for Movies S1 to S2

625       SI References

626

627 **Other supplementary materials for this manuscript include the following:**

628

629       Movies S1 to S2

630

631

632

633

634

635

636

637

638

639

640 **Supplementary Information Text**

641

642 **Supplementary methods.** Embryos were generated via artificial fertilization and incubation. To collect  
643 sperm, males from each population were euthanized using an overdose of buffered tricaine  
644 methanesulfonate (MS-222), and their testes were immediately dissected and macerated. Eggs were  
645 then gently extruded from gravid females from the same population into a petri dish and the macerated  
646 testes were pipetted over the eggs to fertilize them. Distilled water with 6 ppt Instant Ocean® was used  
647 to repeatedly rinse the newly fertilized clutches before being stored in that solution in the petri dish. The  
648 clutches were inspected daily for proper development; dead embryos and unfertilized eggs were  
649 removed, and the water was changed.

650 Once the embryos arrived at the University of Illinois Urbana-Champaign, each clutch was  
651 transferred into a plastic cup with a mesh bottom and clipped to the side of a tank (one clutch per tank;  
652 (9.5L 32 x 21 x 19 cm)). A bubbler was placed under the cup to provide aeration. Tanks used for rearing  
653 embryos were lined with gravel and had a refuge (artificial plant). Embryos were checked daily and dead  
654 embryos were removed. Upon hatching (8-13 days post fertilization) fry were fed brine shrimp daily. Once  
655 the eggs had hatched the mesh cup and bubbler were removed.

656 At approximately two months of age, the fish were gradually introduced to a mixed diet of frozen  
657 bloodworms, frozen brine shrimp, and frozen Mysis shrimp and were fed ad lib once a day. To prevent  
658 overcrowding, families were culled to a maximum of 30 fish per tank at two months, and to a maximum of  
659 15 fish at approximately six months. Throughout the experiment each family was maintained in its own  
660 tank. Therefore, tank effects could potentially contribute to differences among families. Tanks from each  
661 population were evenly distributed around the fish room in an attempt to control for location effects.

662 Tissue for DNA was collected by swabbing the side of each fish with a sterile cotton swab to  
663 collect DNA for non-invasively determining the sex of each fish with a genetic marker (1). Total genomic  
664 DNA was extracted using the DNEasy® Blood and Tissue Kit (Qiagen, Venlo, Netherlands).

665 Tanks used for behavioral observations (36L x 33W x 24H cm) had lines drawn on the bottom to  
666 separate it into equal thirds (i.e., left, center, right). Each observation tank was lined with gravel, but the  
667 floor was cleared immediately around the lines so that they were still visible from a “top-down” view for the  
668 novel object test. A plastic plant was placed into the middle third of each tank to provide a refuge. Opaque  
669 dividers were inserted between the observation tanks during behavioral testing; otherwise individuals had  
670 visual access to fish in neighboring tanks.

671 **Measuring neophilia as response to a novel object.** To set up the neophilia assay, the plastic  
672 plant was removed, plastic dividers were placed on all sides of the tank, and a mirror was positioned at a  
673 45-degree angle above the tank to provide a top-down view. A camcorder (JVC Everio HD Hard Dish  
674 Camcorder Model No: GZ-HD40U) was used to record the trial via the mirror. A perforated tank divider  
675 was used to block the fish from accessing the back part of the tank that was out of the camera’s view.  
676 One of the outside thirds of the tank was randomly selected, and a circular blind was used to corral the  
677 individual into that area. The novel object was then placed in the opposite end. After five minutes, the  
678 blind was removed. The observer recorded how much time was spent orienting towards the novel object  
679 while within one body length of the object. Upon completion of the test, the home tank was reset to its  
680 pretrial state.

681 **Measuring flexibility with the barrier task.** All barrier detour task-related trials occurred in a  
682 separate testing tank. This tank had the same dimensions as the individual’s home observation tank. No  
683 gravel was present to help increase the salience of the food reward. To begin the session, the individual  
684 was gently scooped with a white cup from their home tank and transferred to an opaque shelter that was  
685 then placed into the back-center of the testing tank and the fish was left undisturbed for three minutes. A  
686 60W mm circle was initially drawn on the center of the floor of the tank (~7 cm from the entrance of the  
687 shelter), and a single blood worm was placed within that circle. Between trials fish were allowed to  
688 reacclimate to the shelter for two minutes. After the fourth trial of the day the fish were returned to their  
689 home tanks. If an individual did not reach criterion within four days, an additional individual from that  
690 family was sampled later in the experiment if possible, in order to maximize the number of individuals  
691 tested within each family. 15 individuals did not reach criterion. For the actual barrier trial fish were given  
692 30 minutes to emerge and solve the task. Eleven fish did not solve the task and eat within 30 minutes. All  
693 fish approached and ate the food on the fourth trial that followed the barrier trial, suggesting that those  
694 that did not solve the task were still motivated by the food reward. Upon completion of the fourth trial, the  
695 individual was returned to its home tank.

696           **Compliance with ethical standards.** Fish were caught in the field using baited minnow traps  
697 under the approval of the State of Alaska’s Department of Fish and Wildlife permit to M. Bensky (FRP P-  
698 17-019 and [FTP 17A-0020](#)). In the lab, the fish were housed in groups before and after the experiment.  
699 All experimental procedures were non-invasive. While the fish were undergoing training they were housed  
700 individually, but were given visual access to neighboring fish when they were not participating in active  
701 trials in order to enhance their welfare. Fish were transferred from their home tank to the training tanks by  
702 gently scooping them in a cup to minimize stress.

703           **Statistical analysis.** When there was a significant effect of population, we first tested the  
704 hypothesis that marine and well-established freshwater populations differ by creating a contrast matrix  
705 that directly compared these two population types (2)(package = “multcomp”; function = “glht”). We then  
706 performed post-hoc tests to compare the newly established freshwater populations. Contrast matrices  
707 were constructed so that post-hoc p-values were adjusted for multiple comparisons. Post-hoc contrasts  
708 focused on the two newly derived populations (Cheney Lake and Loberg Lake) because visual inspection  
709 of the data suggested that they are different. The first post-hoc contrast was between Cheney Lake and  
710 Loberg Lake. Then Cheney Lake, the newest freshwater population (8 years from collection), was  
711 compared to the established freshwater populations, while Loberg Lake (28-34 years from collection) was  
712 compared to the marine fish, and Cheney Lake and Loberg Lake were directly compared.  
713



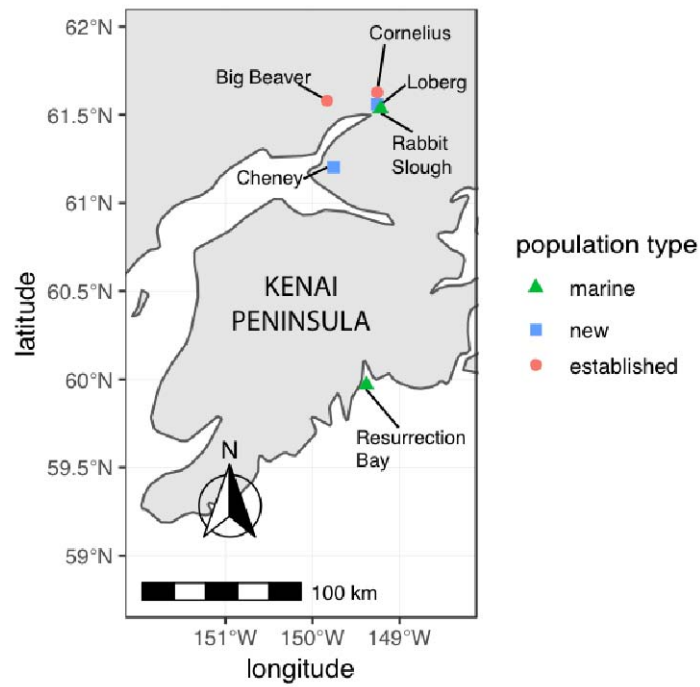

714  
715 **Fig. S1.** Map of sampling sites.  
716  
717

718  
719

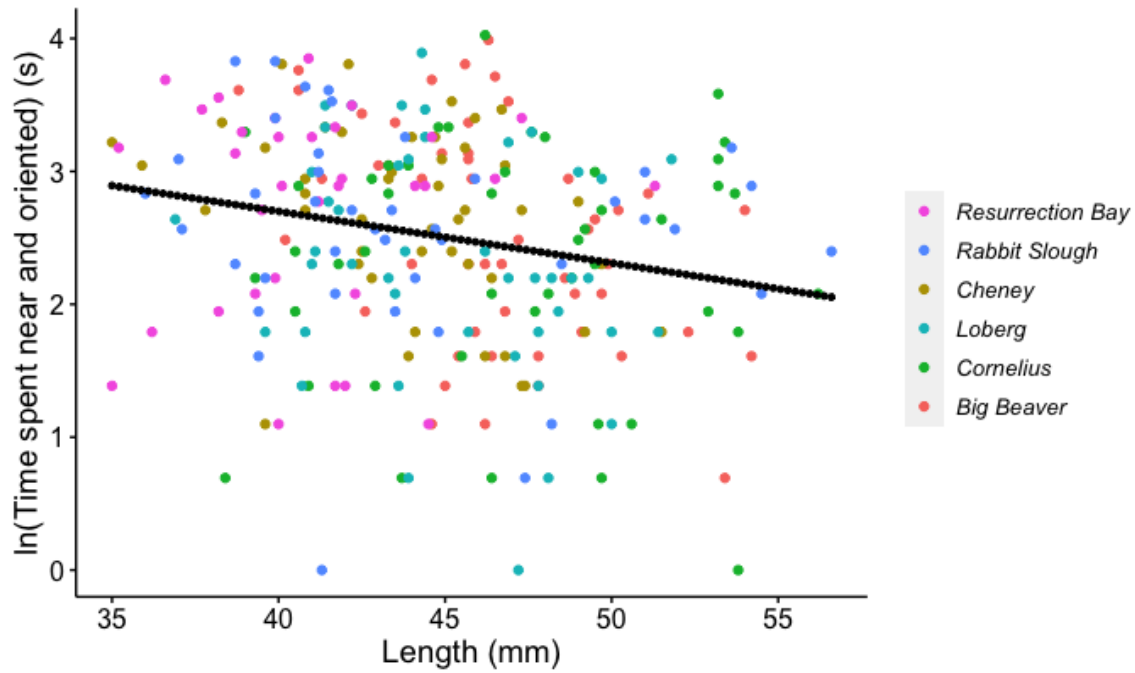

720

721 **Fig. S2.** Bigger fish were less neophilic (spent less time near and oriented to the novel object). Each data  
722 point represents a different individual, color coded by population.

723

724 **Table S1.** Linear mixed models testing the influence of population, length and sex on boldness (latency  
 725 to emerge), flexibility (time at the apex) and neophilia (time near and oriented to the novel object).  
 726 Significant terms are in bold.  
 727

| Behavior                                               | Factor            | Sum Sq        | Mean Sum Sq  | Num DF   | Den DF         | F            | p-value      |
|--------------------------------------------------------|-------------------|---------------|--------------|----------|----------------|--------------|--------------|
| Boldness (latency to emerge)                           |                   |               |              |          |                |              |              |
|                                                        | <b>Population</b> | <b>14.969</b> | <b>2.994</b> | <b>5</b> | <b>58.946</b>  | <b>3.299</b> | <b>0.011</b> |
|                                                        | Length            | 0.037         | 0.037        | 1        | 253.774        | 0.041        | 0.840        |
|                                                        | Sex               | 2.610         | 2.609        | 1        | 248.498        | 2.875        | 0.091        |
| Flexibility (time at the apex)                         |                   |               |              |          |                |              |              |
|                                                        | <b>Population</b> | <b>15.459</b> | <b>3.092</b> | <b>5</b> | <b>58.009</b>  | <b>3.495</b> | <b>0.008</b> |
|                                                        | Length            | 0.0001        | 0.0004       | 1        | 237.932        | 0.001        | 0.982        |
|                                                        | Sex               | 1.008         | 1.008        | 1        | 235.742        | 1.140        | 0.287        |
| Neophilia (time near and oriented to the novel object) |                   |               |              |          |                |              |              |
|                                                        | Population        | 1.474         | 0.295        | 5        | 59.568         | 0.512        | 0.766        |
|                                                        | <b>Length</b>     | <b>3.986</b>  | <b>3.986</b> | <b>1</b> | <b>247.793</b> | <b>6.923</b> | <b>0.009</b> |
|                                                        | Sex               | 0.407         | 0.407        | 1        | 253.628        | 0.707        | 0.401        |

**Table S2. Broad-sense heritabilities and genetic correlations within each population.**

Heritabilities are on the diagonal, genetic correlations are on the off-diagonal, with 95% confidence intervals in parentheses. Bold indicates that the estimate is statistically different from zero. Greater boldness trait values correspond to lower boldness (i.e., slower to emerge), greater flexibility trait values correspond to less flexibility (i.e., more time persisting at the apex of the barrier).

**Big Beaver.** Sample size for correlations with flexibility is n=43, otherwise n=50

|             | Boldness                    | Flexibility            | Neophilia              |
|-------------|-----------------------------|------------------------|------------------------|
| Boldness    | <b>0.754 (0.153, 1.000)</b> | -0.588 (-0.880, 0.295) | -0.219 (-0.747, 0.443) |
| Flexibility | --                          | 0.225 (0.000, 0.974)   | -0.327 (-0.782, 0.431) |
| Neophilia   | --                          | --                     | 0.096 (0.000, 0.437)   |

**Cheney Lake.** Sample size for correlations with flexibility is n=43, otherwise n=46

|             | Boldness             | Flexibility            | Neophilia              |
|-------------|----------------------|------------------------|------------------------|
| Boldness    | 0.252 (0.000, 0.983) | -0.718 (-0.925, 0.134) | 0.171 (-0.584, 0.667)  |
| Flexibility | --                   | 0.325 (0.000, 0.994)   | 0.0144 (-0.574, 0.647) |
| Neophilia   | --                   | --                     | 0.151 (0.000, 0.684)   |

**Cornelius.** Sample size for correlations with flexibility is n=45, otherwise n=46

|             | Boldness                    | Flexibility                    | Neophilia                      |
|-------------|-----------------------------|--------------------------------|--------------------------------|
| Boldness    | <b>0.737 (0.092, 1.000)</b> | <b>-0.777 (-0.931, -0.231)</b> | <b>-0.762 (-0.899, -0.206)</b> |
| Flexibility | --                          | <b>0.864 (0.378, 1.000)</b>    | <b>0.599 (0.053, 0.895)</b>    |
| Neophilia   | --                          | --                             | <b>0.876 (0.458, 1.000)</b>    |

**Loberg Lake.** Sample size for correlations with flexibility is n= 44, otherwise n= 45

|             | Boldness             | Flexibility            | Neophilia              |
|-------------|----------------------|------------------------|------------------------|
| Boldness    | 0.103 (0.000, 0.511) | -0.619 (-0.903, 0.282) | -0.586 (-0.862, 0.381) |
| Flexibility | --                   | 0.692 (0.014, 1.000)   | 0.585 (-0.258, 0.856)  |
| Neophilia   | --                   | --                     | 0.378 (0.000, 0.993)   |

**Rabbit Slough.** Sample size for correlations with flexibility is n=40, otherwise n=42

|             | Boldness             | Flexibility            | Neophilia              |
|-------------|----------------------|------------------------|------------------------|
| Boldness    | 0.322 (0.000, 0.991) | -0.663 (-0.903, 0.298) | -0.206 (-0.691, 0.614) |
| Flexibility | --                   | 0.329 (0.000, 0.996)   | 0.094 (-0.571, 0.758)  |
| Neophilia   | --                   | --                     | 0.183 (0.000, 0.892)   |

**Resurrection Bay.** Sample size for correlations with flexibility is n=31, otherwise n=33

|             | Boldness                    | Flexibility            | Neophilia              |
|-------------|-----------------------------|------------------------|------------------------|
| Boldness    | <b>0.700 (0.012, 1.000)</b> | -0.756 (-0.936, 0.259) | -0.237 (-0.746, 0.614) |
| Flexibility | --                          | 0.279 (0.000, 0.995)   | -0.011 (-0.700, 0.753) |
| Neophilia   | --                          | --                     | 0.355 (0.000, 0.993)   |

**Table S3. Phenotypic correlations (Pearson) within each population.** Bold indicates  $P < 0.05$ .

**Populations combined.** Sample size for correlations with flexibility is  $n=247$ , otherwise  $n=262$

|             | Boldness | Flexibility   | Neophilia     |
|-------------|----------|---------------|---------------|
| Boldness    | --       | <b>-0.522</b> | <b>-0.315</b> |
| Flexibility |          | --            | <b>0.229</b>  |
| Neophilia   |          |               | --            |

**Big Beaver.** Sample size for correlations with flexibility is  $n=43$ , otherwise  $n=50$

|             | Boldness | Flexibility   | Neophilia     |
|-------------|----------|---------------|---------------|
| Boldness    | --       | <b>-0.297</b> | <b>-0.422</b> |
| Flexibility |          | --            | 0.038         |
| Neophilia   |          |               | --            |

**Cheney Lake.** Sample size for correlations with flexibility is  $n=43$ , otherwise  $n=46$

|             | Boldness | Flexibility   | Neophilia |
|-------------|----------|---------------|-----------|
| Boldness    | --       | <b>-0.576</b> | -0.100    |
| Flexibility |          | --            | 0.156     |
| Neophilia   |          |               | --        |

**Cornelius.** Sample size for correlations with flexibility is  $n=45$ , otherwise  $n=46$

|             | Boldness | Flexibility   | Neophilia     |
|-------------|----------|---------------|---------------|
| Boldness    | --       | <b>-0.618</b> | <b>-0.554</b> |
| Flexibility |          | --            | <b>0.450</b>  |
| Neophilia   |          |               | --            |

**Loberg Lake.** Sample size for correlations with flexibility is  $n=44$ , otherwise  $n=45$

|             | Boldness | Flexibility   | Neophilia     |
|-------------|----------|---------------|---------------|
| Boldness    | --       | <b>-0.402</b> | <b>-0.422</b> |
| Flexibility |          | --            | <b>0.293</b>  |
| Neophilia   |          |               | --            |

**Rabbit Slough.** Sample size for correlations with flexibility is  $n=40$ , otherwise  $n=42$

|          | Boldness | Flexibility   | Neophilia |
|----------|----------|---------------|-----------|
| Boldness | --       | <b>-0.440</b> | -0.085    |

|             |    |       |
|-------------|----|-------|
| Flexibility | -- | 0.228 |
| Neophilia   |    | --    |

**Resurrection Bay.** Sample size for correlations with flexibility is n=31, otherwise n=33

|             | Boldness | Flexibility   | Neophilia |
|-------------|----------|---------------|-----------|
| Boldness    | --       | <b>-0.478</b> | -0.127    |
| Flexibility |          | --            | 0.021     |
| Neophilia   |          |               | --        |

**Table S4. Repeatability of latency to emerge across four trials.** Repeatability estimate was calculated using Bayesian statistics with Markov Chain Monte Carlo simulations using MCMCglmm package (3) in R 3.5.3 (<http://www.r-project.org/>). A Poisson distribution was used because latency to emerge was positively skewed and used full integer time durations. We used non-informative proper priors with 1 000 000 iterations, thinning of 100 iterations, and burn-in of 100 000 iterations. Through these simulations, 95% confidence intervals were generated with significance of our estimate inferred according to whether the lower bound of the interval approached zero.

| <b>Population</b> | <b>n</b> | <b>Repeatability</b> | <b>Lower, Upper CI</b> |
|-------------------|----------|----------------------|------------------------|
| Big Beaver        | 50       | 0.6985               | (0.5620,0.7866)        |
| Cornelius         | 46       | 0.6083               | (0.4782,0.7367)        |
| Loberg Lake       | 45       | 0.6565               | (0.4950,0.7553)        |
| Cheney Lake       | 46       | 0.6499               | (0.5385,0.7824)        |
| Rabbit Slough     | 42       | 0.5645               | (0.3961,0.7019)        |
| Resurrection Bay  | 33       | 0.7528               | (0.6218,0.8605)        |



1 **Movie S1 (separate file):** Boldness assay (emergence from a refuge)

2

3 **Movie S2 (separate file):** Flexibility assay (response to a barrier)

4

5

6 **SI References**

7

8 1. C. L. Peichel *et al.*, The master sex-determination locus in threespine sticklebacks is on a  
9 nascent Y chromosome. *Current Biology* **14**, 1416-1424 (2004).

10 2. R. C. Team, *R: A language and environment for statistical computing* (R Foundation for Statistical  
11 Computing, Vienna, Austria, 2013).

12 3. J. D. Hadfield, MCMC methods for multi-response generalized linear mixed models: The  
13 MCMCglmm R package. *2010* **33**, 22 (2010).

14

15

16

17
